# Supplementary material for: Impella Versus VA-ECMO for Patients with Cardiogenic Shock: Comprehensive Systematic Literature Review and Meta-Analyses
Source: MDPI journal article supplement (doi:10.3390/jcdd10040158), 2023-04-05
Supplement: s1 [file s1]

## Supplementary materials

**Table S1. PRISMA Checklist**

| SECTION                            | ITEM | PRISMA – ScR CHECKLIST ITEM                                                                                                                                                                                                                                                                                 | REPORTED ON PAGE # |
|------------------------------------|------|-------------------------------------------------------------------------------------------------------------------------------------------------------------------------------------------------------------------------------------------------------------------------------------------------------------|--------------------|
| <b>TITLE</b>                       |      |                                                                                                                                                                                                                                                                                                             |                    |
| Title                              | 1    | Identify the report as a systematic review, meta-analysis, or both.                                                                                                                                                                                                                                         | 1                  |
| <b>ABSTRACT</b>                    |      |                                                                                                                                                                                                                                                                                                             |                    |
| Structured summary                 | 2    | Provide a structured summary including, as applicable: background; objectives; data sources; study eligibility criteria, participants, and interventions; study appraisal and synthesis methods; results; limitations; conclusions and implications of key findings; systematic review registration number. | 2                  |
| <b>INTRODUCTION</b>                |      |                                                                                                                                                                                                                                                                                                             |                    |
| Rationale                          | 3    | Describe the rationale for the review in the context of what is already known.                                                                                                                                                                                                                              | 3                  |
| Objectives                         | 4    | Provide an explicit statement of questions being addressed with reference to participants, interventions, comparisons, outcomes, and study design (PICOS).                                                                                                                                                  | 4                  |
| <b>METHODS</b>                     |      |                                                                                                                                                                                                                                                                                                             |                    |
| Protocol and registration          | 5    | Indicate if a review protocol exists, if and where it can be accessed (e.g., Web address), and, if available, provide registration information including registration number.                                                                                                                               | 4                  |
| Eligibility criteria               | 6    | Specify study characteristics (e.g., PICOS, length of follow-up) and report characteristics (e.g., years considered, language, publication status) used as criteria for eligibility, giving rationale.                                                                                                      | 4-5                |
| Information sources                | 7    | Describe all information sources (e.g., databases with dates of coverage, contact with study authors to identify additional studies) in the search and date last searched.                                                                                                                                  | 4                  |
| Search                             | 8    | Present full electronic search strategy for at least one database, including any limits used, such that it could be repeated.                                                                                                                                                                               | 4                  |
| Study selection                    | 9    | State the process for selecting studies (i.e., screening, eligibility, included in systematic review, and, if applicable, included in the meta-analysis).                                                                                                                                                   | 5                  |
| Data collection process            | 10   | Describe method of data extraction from reports (e.g., piloted forms, independently, in duplicate) and any processes for obtaining and confirming data from investigators.                                                                                                                                  | 5                  |
| Data items                         | 11   | List and define all variables for which data were sought (e.g., PICOS, funding sources) and any assumptions and simplifications made.                                                                                                                                                                       | 5-6                |
| Risk of bias in individual studies | 12   | Describe methods used for assessing risk of bias of individual studies (including specification of                                                                                                                                                                                                          | 6                  |

|                               |    |                                                                                                                                                                                                                              |       |
|-------------------------------|----|------------------------------------------------------------------------------------------------------------------------------------------------------------------------------------------------------------------------------|-------|
|                               |    | whether this was done at the study or outcome level), and how this information is to be used in any data synthesis.                                                                                                          |       |
| Summary measures              | 13 | State the principal summary measures (e.g., risk ratio, difference in means).                                                                                                                                                | 5     |
| Synthesis of results          | 14 | Describe the methods of handling data and combining results of studies, if done, including measures of consistency (e.g., $I^2$ ) for each meta-analysis.                                                                    | 5     |
| Risk of bias across studies   | 15 | Specify any assessment of risk of bias that may affect the cumulative evidence (e.g., publication bias, selective reporting within studies).                                                                                 | 10    |
| Additional analyses           | 16 | Describe methods of additional analyses (e.g., sensitivity or subgroup analyses, metaregression), if done, indicating which were pre-specified                                                                               | NA    |
| <b>RESULTS</b>                |    |                                                                                                                                                                                                                              |       |
| Study selection               | 17 | Give numbers of studies screened, assessed for eligibility, and included in the review, with reasons for exclusions at each stage, ideally with a flow diagram.                                                              | 6     |
| Study characteristics         | 18 | For each study, present characteristics for which data were extracted (e.g., study size, PICOS, follow-up period) and provide the citations.                                                                                 | 6-7   |
| Risk of bias within studies   | 19 | Present data on risk of bias of each study and, if available, any outcome-level assessment (see Item 12).                                                                                                                    | NA    |
| Results of individual studies | 20 | For all outcomes considered (benefits or harms), present, for each study: (a) simple summary data for each intervention group and (b) effect estimates and confidence intervals, ideally with a forest plot.                 | 7-10  |
| Synthesis of results          | 21 | Present results of each meta-analysis done, including confidence intervals and measures of consistency.                                                                                                                      | 7-10  |
| Risk of bias across studies   | 22 | Present results of any assessment of risk of bias across studies (see Item 15). Additional analysis 23 Give results of additional analyses, if done (e.g., sensitivity or subgroup analyses, meta-regression [see Item 16]). | 10    |
| <b>DISCUSSION</b>             |    |                                                                                                                                                                                                                              |       |
| Summary of evidence           | 24 | Summarize the main findings including the strength of evidence for each main outcome; consider their relevance to key groups (e.g., health care providers, users, and policy makers).                                        | 10-12 |
| Limitations                   | 25 | Discuss limitations at study and outcome level (e.g., risk of bias), and at review level (e.g., incomplete retrieval of identified research, reporting bias).                                                                | 12-13 |
| Conclusions                   | 26 | Provide a general interpretation of the results in the context of other evidence, and implications for future research.                                                                                                      | 13-14 |
| <b>FUNDING</b>                |    |                                                                                                                                                                                                                              |       |

|         |    |                                                                                                                                            |    |
|---------|----|--------------------------------------------------------------------------------------------------------------------------------------------|----|
| Funding | 27 | Describe sources of funding for the systematic review and other support (e.g., supply of data); role of funders for the systematic review. | 15 |
|---------|----|--------------------------------------------------------------------------------------------------------------------------------------------|----|

**Table S2. Search strategy**

|              | Pub Med                                                                                                                                                                                                                                                                                                                                                                                                                                                                                                                             | Web of Science                                                                                                                                                                                                                                                                                                                                                                                                                                                                                                                      |
|--------------|-------------------------------------------------------------------------------------------------------------------------------------------------------------------------------------------------------------------------------------------------------------------------------------------------------------------------------------------------------------------------------------------------------------------------------------------------------------------------------------------------------------------------------------|-------------------------------------------------------------------------------------------------------------------------------------------------------------------------------------------------------------------------------------------------------------------------------------------------------------------------------------------------------------------------------------------------------------------------------------------------------------------------------------------------------------------------------------|
| Search date  | 21/02/2022                                                                                                                                                                                                                                                                                                                                                                                                                                                                                                                          | 21/02/2022                                                                                                                                                                                                                                                                                                                                                                                                                                                                                                                          |
| Search query | ((("Impella") OR ("ECMO" OR "extracorporeal membrane oxygenation" OR "extra-corporeal membrane oxygenation"))) AND ("Cardiogenic shock*" OR "Myocardial infarction*" OR "Cardiac shock*" OR "Cardiovascular shock*" OR "Heart shock*" OR "Acute cardiac failure*" OR "Acute decompensated heart failure*" OR "ADHF*" OR "Acute heart insufficiency*" OR "Low cardiac output*" OR "Low output syndrome*" OR "Systolic dysfunction*" OR "Temporary mechanical support*" OR "Extra corporeal support*" OR "Extra-corporeal support*")) | ((("Impella") OR ("ECMO" OR "extracorporeal membrane oxygenation" OR "extra-corporeal membrane oxygenation"))) AND ("Cardiogenic shock*" OR "Myocardial infarction*" OR "Cardiac shock*" OR "Cardiovascular shock*" OR "Heart shock*" OR "Acute cardiac failure*" OR "Acute decompensated heart failure*" OR "ADHF*" OR "Acute heart insufficiency*" OR "Low cardiac output*" OR "Low output syndrome*" OR "Systolic dysfunction*" OR "Temporary mechanical support*" OR "Extra corporeal support*" OR "Extra-corporeal support*")) |
| Field        | Title/Abstract                                                                                                                                                                                                                                                                                                                                                                                                                                                                                                                      | All field (Topic)                                                                                                                                                                                                                                                                                                                                                                                                                                                                                                                   |
| Time frame   | 2017-2022                                                                                                                                                                                                                                                                                                                                                                                                                                                                                                                           | 2017-2022                                                                                                                                                                                                                                                                                                                                                                                                                                                                                                                           |

**Table S3. Inclusion and exclusion criteria**

|                       | Inclusion                                                                                                                                                                                                                                  | Exclusion                                                                                                                                                                                                                                                                                                                                                                                           |
|-----------------------|--------------------------------------------------------------------------------------------------------------------------------------------------------------------------------------------------------------------------------------------|-----------------------------------------------------------------------------------------------------------------------------------------------------------------------------------------------------------------------------------------------------------------------------------------------------------------------------------------------------------------------------------------------------|
| Study Design          | <ul style="list-style-type: none"> <li>• Randomized control trials (RCTs), Observational studies (e.g., prospective, retrospective)</li> <li>• Economic evaluations (e.g., cost-effectiveness analyses, budget impact analyses)</li> </ul> | <ul style="list-style-type: none"> <li>• Case reports</li> <li>• Case studies on single patients, clinical guidelines and procedures</li> <li>• Diagnostic procedures</li> <li>• Study protocols</li> <li>• Reviews, systematic literature reviews, meta-analyses</li> <li>• Position papers</li> <li>• Expert consensus statement</li> <li>• Editorials</li> <li>• Comments and letters</li> </ul> |
| Other characteristics | <ul style="list-style-type: none"> <li>• Specific outcome values</li> <li>• Data disaggregated by device</li> </ul>                                                                                                                        | <ul style="list-style-type: none"> <li>• Aggregated outcomes</li> <li>• No data</li> <li>• Text not available</li> </ul>                                                                                                                                                                                                                                                                            |
| Language              | <ul style="list-style-type: none"> <li>• English</li> <li>• Italian</li> </ul>                                                                                                                                                             | Other languages                                                                                                                                                                                                                                                                                                                                                                                     |
| Device                | <ul style="list-style-type: none"> <li>• Impella</li> <li>• ECMO</li> </ul>                                                                                                                                                                | • Combination of ECMO and Impella (ECPella)                                                                                                                                                                                                                                                                                                                                                         |

|                   |                                    |                                                                                                                                                                                                                                                                                                                                                                               |
|-------------------|------------------------------------|-------------------------------------------------------------------------------------------------------------------------------------------------------------------------------------------------------------------------------------------------------------------------------------------------------------------------------------------------------------------------------|
|                   |                                    | <ul style="list-style-type: none"> <li>• Other devices (IABP, TandemHeart, Centrimag, ...)</li> <li>• Pharmacologic therapies</li> </ul>                                                                                                                                                                                                                                      |
| Target Population | Cardiogenic shock                  | <ul style="list-style-type: none"> <li>• Cardiac arrest</li> <li>• Post cardiectomy</li> <li>• Protected PCI</li> <li>• Refractory cardiogenic shock</li> <li>• Takotsubo cardiomyopathy               <ul style="list-style-type: none"> <li>• viral or bacteriological infections (e.g., COVID)</li> </ul> </li> <li>• Other diseases (pulmonary, cerebral, ...)</li> </ul> |
| Age               | Adults (except for pregnant women) | Children, adolescents                                                                                                                                                                                                                                                                                                                                                         |

**Table S4. Data extraction: list of variables**

| Classification                             | Outcome                                                                               | Unit of Measure    |
|--------------------------------------------|---------------------------------------------------------------------------------------|--------------------|
| Outcome - Survival and cardiac outcomes    | Mortality:                                                                            | Number of Patients |
|                                            | - quantitative timings: 30 days; 6 months, 1 year                                     |                    |
|                                            | - qualitative timings: discharge, on device, to next therapy, in hospital, to explant |                    |
|                                            | Survival (idem as mortality)                                                          | Number of Patients |
|                                            | Weaning                                                                               | Number of Patients |
|                                            | Myocardial recovery                                                                   | Number of Patients |
| Outcome - Safety in hospital complications | Bridge to LVAD                                                                        | Number of Patients |
|                                            | Bridge to transplant                                                                  | Number of Patients |
|                                            | Bleeding (major, access-site)                                                         | Number of Patients |
|                                            | Limb ischemia                                                                         | Number of Patients |
|                                            | Ischemic stroke                                                                       | Number of Patients |
|                                            | LV perforation                                                                        | Number of Patients |
|                                            | Aortic valve injury                                                                   | Number of Patients |
|                                            | Mitral valve injury                                                                   | Number of Patients |
|                                            | Aortic dissection                                                                     | Number of Patients |
|                                            | Hemolysis (major, minor)                                                              | Number of Patients |
|                                            | Sepsis                                                                                | Number of Patients |
|                                            | Renal failure (acute, ...)                                                            | Number of Patients |
|                                            | Other outcomes                                                                        | Number of Patients |
| Outcome - Device related outcomes          | Days in hospital/ICU                                                                  | Days               |
|                                            | Duration of support (days on ECMO/Impella)                                            | Days               |
|                                            | Early mobilization and physiotherapy                                                  | Number of Patients |
|                                            | Average Impella pump flow                                                             | l/min              |
|                                            | Average Impella performance level                                                     | 0-9                |

|                                     |                          |                  |
|-------------------------------------|--------------------------|------------------|
|                                     | Major device malfunction | Number of events |
|                                     | Device exchange          | Number of events |
| Resource use and<br>Quality of life | Resource use             | Currency         |
|                                     | Quality of life          | EuroQoL          |

**Table S5. Characteristics of included studies**

| Author                    | Country        | Study design (RCT, Observational study, ...)              | Device  | N. Patients | Average age |
|---------------------------|----------------|-----------------------------------------------------------|---------|-------------|-------------|
| Jin (2022)                | United States  | Retrospective observational multi-centre study (database) | Impella | 1592        | 66          |
| Ikeda (2022)              | Japan          | Retrospective observational single-centre study           | Impella | 61          | 68          |
| Nouri (2022)              | United States  | Retrospective observational single-centre study           | Impella | 115         | 64          |
| Takahashi (2022)          | Japan          | Retrospective observational single-centre study           | Impella | 22          | 74          |
| Marin Cuartas (2022)      | Germany        | Retrospective observational single-centre study           | Impella | 19          | 65          |
| Carter (2022)             | United States  | Retrospective observational multi-centre study (database) | ECMO    | 146         | 33          |
| Lee (2021)                | South Korea    | Retrospective observational multi-centre study (database) | ECMO    | 269         | 62          |
| Dhruva (2020)             | United States  | Retrospective observational multi-centre study (database) | Impella | 1680        | 64          |
| Boshara (2021)            | United States  | Retrospective observational single-centre study           | Impella | 31          | 64          |
| Kaki (2019)               | United States  | Retrospective observational single-centre study           | Impella | 17          | 68          |
| Lang (2021)               | Germany        | Retrospective observational multi-centre study            | Impella | 3945        | 66          |
|                           |                |                                                           | ECMO    | 9774        | 66          |
| Char (2021)               | United States  | Retrospective observational single-centre study           | ECMO    | 143         | 58          |
| Singh (2021)              | United States  | Retrospective observational multi-centre study            | Impella | 649         | 65          |
| Hernandez-Montfort (2021) | United States  | Retrospective observational multi-centre study            | Impella | 148         | 58          |
|                           |                |                                                           | ECMO    | 106         | 58          |
| Kondo (2021)              | Japan          | Retrospective observational single-centre study           | Impella | 7           | 43          |
| Karatolios (2021)         | Germany        | Retrospective observational single-centre study           | Impella | 83          | 64          |
| Karatolios (2021)         |                |                                                           | ECMO    | 83          | 63          |
| Schäfer (2021)            | Germany; Italy | Retrospective observational multi-centre study            | Impella | 202         | 66          |
| Tadokoro (2021)           | Japan          | Retrospective observational single-centre study           | ECMO    | 48          | 44          |
| Shin (2021)               | South Korea    | Retrospective observational single-centre study           | ECMO    | 67          | >65         |
| Schurtz (2021)            | France         | Retrospective observational single-centre study           | Impella | 31          | 59          |
|                           |                |                                                           | ECMO    | 97          | 52          |
| Pahuja (2021)             | United States  | Retrospective observational multi-centre study            | ECMO    | 444         |             |
| Hernández-Pérez (2021)    | Spain          | Retrospective observational single-centre study           | ECMO    | 130         | 52          |
| Karami (2021)             | Netherlands    | Multi-centre randomized control trial                     | Impella | 24          | 58          |

|                        |                  |                                                           |         |     |     |
|------------------------|------------------|-----------------------------------------------------------|---------|-----|-----|
| Wang (2021)            | China            | Retrospective observational multi-centre study (database) | ECMO    | 235 | 57  |
| Lackermair (2021)      | Germany          | Multi-centre randomized control trial                     | ECMO    | 21  | 62  |
| Haurand (2021)         | Germany          | Retrospective observational single-centre study           | Impella | 62  | >60 |
| Mierke (2021)          | Germany          | Retrospective observational single-centre study           | Impella | 97  | 69  |
| Szczanowicz (2021)     | Germany          | Retrospective observational single-centre study           | ECMO    | 79  | 60  |
| Kim (2021)             | South Korea      | Prospective observational single-centre study             | ECMO    | 79  | 61  |
| Nersesian (2021)       | Germany          | Retrospective observational multi-centre study            | Impella | 64  | 70  |
|                        |                  |                                                           | Impella | 62  | 59  |
| Brunner (2019)         | Germany          | Multi-centre randomized control trial                     | ECMO    | 21  | 62  |
| Nelson (2021)          | United States    | Retrospective observational single-centre study           | Impella | 34  | 58  |
| Diakos (2021)          | United States    | Retrospective observational single-centre study           | Impella | 63  |     |
|                        |                  |                                                           | ECMO    | 37  |     |
| Pieri (2020)           | Italy            | Retrospective observational single-centre study           | Impella | 150 | >55 |
| Monteagudo Vela (2020) | United Kingdom   | Retrospective observational single-centre study           | Impella | 57  | 54  |
| Lee (2020)             | South Korea      | Retrospective observational single-centre study           | ECMO    | 46  | 65  |
| Kajy (2020)            | United States    | Retrospective observational single-centre study           | Impella | 29  | 66  |
| Fagot (2020)           | France           | Retrospective observational single-centre study           | Impella | 62  | 58  |
| Pozzi (2020)           | France           | Retrospective observational single-centre study           | ECMO    | 56  | 57  |
| Li (2020)              | China            | Retrospective observational single-centre study           | ECMO    | 23  | 55  |
| Basir (2019)           | United States    | Prospective observational multi-centre study              | Impella | 171 | 63  |
| Lemor (2020)           | United States    | Retrospective observational multi-centre study (database) | Impella | 450 | 60  |
|                        |                  |                                                           | ECMO    | 450 | 61  |
| Esposito (2019)        | United States    | Retrospective observational single-centre study           | Impella | 23  | 62  |
| Fahad (2020)           | United States    | Retrospective observational single-centre study           | Impella | 34  | >60 |
| Schäfer (2020)         | Germany; Denmark | Retrospective observational multi-centre study            | Impella | 166 | 65  |
| Hassett (2020)         | United States    | Retrospective observational single-centre study           | Impella | 79  | 63  |
| Schrage (2020)         | Germany          | Retrospective observational multi-centre study            | ECMO    | 255 | 57  |
| Loehn (2020)           | Germany          | Retrospective observational single-centre study           | Impella | 39  | 66  |
| Scherer (2020)         | Germany          | Retrospective observational single-centre study           | Impella | 70  | 67  |
| Karami (2020)          | Netherlands      | Retrospective observational multi-centre study            | Impella | 90  | 60  |

|                        |                |                                                           |         |      |    |
|------------------------|----------------|-----------------------------------------------------------|---------|------|----|
|                        |                |                                                           | ECMO    | 38   | 55 |
| Chommeloux (2020)      | France         | Retrospective observational single-centre study           | ECMO    | 14   | 58 |
| Sieweke (2020)         | Germany        | Prospective observational single-centre study             | Impella | 24   | 64 |
| Hong (2020)            | South Korea    | Retrospective observational single-centre study           | ECMO    | 255  | 64 |
| Choi (2020)            | South Korea    | Retrospective observational single-centre study           | ECMO    | 147  | 65 |
| Trpkov (2020)          | Canada         | Retrospective observational single-centre study           | Impella | 34   | 57 |
| Haberkorn (2020)       | Germany        | Retrospective observational single-centre study           | Impella | 50   | 65 |
| Becher (2020)          | Germany        | Retrospective observational multi-centre study (database) | ECMO    | 8351 | 62 |
| Vallabhajosyula (2020) | United States  | Retrospective observational multi-centre study (database) | ECMO    | 1469 | 58 |
| Sonu (2020)            | United States  | Retrospective observational multi-centre study (database) | Impella | 840  | 69 |
| Ali (2020)             | United Kingdom | Retrospective observational single-centre study           | ECMO    | 24   | 35 |
| Alushi (2019)          | Germany        | Retrospective observational multi-centre study            | Impella | 62   | 73 |
| Yourshaw (2019)        | United States  | Retrospective observational single-centre study           | Impella | 25   | 55 |
| Karatolios (2019)      | Greece         | Retrospective observational single-centre study           | Impella | 8    | 78 |
| Schrage (2019)         | Europe         | Retrospective observational multi-centre study (database) | Impella | 115  | 71 |
| Morshuis (2019)        | Germany        | Retrospective observational single-centre study           | ECMO    | 134  | 53 |
| Monteagudo-Vela (2021) | United Kingdom | Retrospective observational single-centre study           | Impella | 8    | 49 |
| O'Neill (2019)         | United States  | Retrospective observational multi-centre study (database) | Impella | 475  | 65 |
| Garan (2019)           | United States  | Prospective observational single-centre study             | Impella | 11   | 61 |
|                        |                |                                                           | ECMO    | 16   | 64 |
| Ouweneel (2017)        | Netherlands    | Multi-centre randomized control trial                     | Impella | 24   | 58 |
| Ouweneel (2019)        | Netherlands    | Retrospective observational single-centre study           | Impella | 112  | 60 |
| Hritani (2019)         | United States  | Retrospective observational single-centre study           | Impella | 13   | 74 |
| Abouelwafa (2019)      | Egypt          | Prospective observational single-centre study             | ECMO    | 10   | 43 |
| Rohm (2019)            | United States  | Retrospective observational single-centre study           | Impella | 204  | 60 |
| Fux (2019)             | Sweden         | Retrospective observational single-centre study           | ECMO    | 76   | 52 |
| O'Neill (2018)         | United States  | Retrospective observational multi-centre study (database) | Impella | 479  | 65 |
| Chong (2018)           | Taiwan         | Retrospective observational single-centre study           | ECMO    | 35   | 41 |
| Matsumoto (2018)       | Japan          | Retrospective observational single-centre study           | ECMO    | 37   | 42 |
| El Sibai (2018)        | United States  | Retrospective observational multi-centre study (database) | ECMO    | 992  | 51 |



|                          |                |                                                           |         |      |    |
|--------------------------|----------------|-----------------------------------------------------------|---------|------|----|
| Liao (2018)              | China          | Retrospective observational single-centre study           | ECMO    | 33   | 33 |
| Basir (2018)             | United States  | Retrospective observational multi-centre study            | Impella | 41   | 65 |
| Huang (2018)             | Taiwan         | Retrospective observational single-centre study           | ECMO    | 46   | 57 |
| Yeh (2018)               | Taiwan         | Prospective observational single-centre study             | ECMO    | 48   | 57 |
| Esposito (2018)          | United States  | Retrospective observational single-centre study           | Impella | 19   | 60 |
| El Sibai (2018)          | Lebanon        | Retrospective observational multi-centre study (database) | ECMO    | 796  | 50 |
| Patel (2019)             | United States  | Retrospective observational single-centre study           | ECMO    | 36   | 63 |
| Guenther (2018)          | United States  | Retrospective observational single-centre study           | ECMO    | 10   | 36 |
| Toda (2018)              | Japan          | Retrospective observational single-centre study           | ECMO    | 32   | 31 |
| Pieri (2018)             | Italy          | Retrospective observational single-centre study           | Impella | 28   | 66 |
| Sun (2018)               | Canada         | Retrospective observational single-centre study           | ECMO    | 13   | 54 |
| Lazkani (2017)           | United States  | Retrospective observational single-centre study           | Impella | 81   | 66 |
| Pappalardo (2017)        | Germany; Italy | Retrospective observational multi-centre study            | ECMO    | 42   | 55 |
| Basir (2017)             | United States  | Retrospective observational multi-centre study (database) | Impella | 287  | 66 |
| Le Pennec-Prigent (2017) | France         | Retrospective observational single-centre study           | ECMO    | 26   | 52 |
| Schmack (2017)           | Germany        | Retrospective observational single-centre study           | ECMO    | 28   | 58 |
| Dangers (2017)           | France         | Retrospective observational single-centre study           | ECMO    | 105  | 47 |
| Meraj (2017)             | United States  | Retrospective observational multi-centre study (database) | Impella | 36   | 70 |
| de Waha (2017)           | Germany        | Prospective observational multi-centre study              | ECMO    | 100  | 61 |
| Alhussein (2017)         | Canada         | Retrospective observational single-centre study           | ECMO    | 7    | 33 |
| Vase (2017)              | Denmark        | Retrospective observational single-centre study           | Impella | 12   | 63 |
| Liao (2017)              | China          | Retrospective observational single-centre study           | ECMO    | 94   | 47 |
| Lorusso (2017)           | United States  | Retrospective observational multi-centre study (database) | ECMO    | 5480 | 53 |
| Toda (2022)              | Japan          | Retrospective observational multi-centre study (database) | Impella | 432  | 66 |

**Table S6. Risk of bias assessment. Checklist for cohort studies**

| <b>Study</b>           | <b>1</b> | <b>2</b> | <b>3</b> | <b>4</b> | <b>5</b> | <b>6</b> | <b>7</b> | <b>8</b> | <b>9</b> | <b>10</b> | <b>11</b> | <b>12</b> |
|------------------------|----------|----------|----------|----------|----------|----------|----------|----------|----------|-----------|-----------|-----------|
| Jin (2022)             | Yes      | Yes      | Yes      | Yes      | Yes      | No       | Yes      | Yes      | Yes      | NA        | Yes       | Include   |
| Takahashi (2022)       | Yes      | Yes      | Yes      | No       | NA       | No       | Yes      | Yes      | Yes      | NA        | Yes       | Include   |
| Boshara (2021)         | NA       | NA       | Yes      | NA       | NA       | No       | Yes      | Yes      | Yes      | NA        | No        | Include   |
| Char (2021)            | Yes      | Yes      | Yes      | No       | NA       | No       | Yes      | Yes      | Yes      | NA        | Yes       | Include   |
| Singh (2021)           | NA       | NA       | Yes      | NA       | NA       | No       | Yes      | Yes      | Yes      | NA        | Yes       | Include   |
| Karatolios (2021)      | Yes      | Yes      | Yes      | No       | NA       | No       | Yes      | Yes      | Yes      | NA        | Yes       | Include   |
| Schurtz (2021)         | Yes      | Yes      | Yes      | No       | NA       | No       | Yes      | Yes      | Yes      | NA        | Yes       | Include   |
| Nersesian (2021)       | Yes      | Yes      | Yes      | No       | NA       | No       | Yes      | Yes      | Yes      | NA        | Yes       | Include   |
| Monteagudo Vela (2020) | NA       | NA       | Yes      | NA       | NA       | No       | Yes      | Yes      | Yes      | NA        | Yes       | Include   |
| Lee (2020)             | NA       | NA       | Yes      | NA       | NA       | No       | Yes      | Yes      | Yes      | NA        | Yes       | Include   |
| Loehn (2020)           | NA       | NA       | Yes      | NA       | NA       | No       | Yes      | Yes      | Yes      | Yes       | Yes       | Include   |
| Scherer (2020)         | Yes      | Yes      | Yes      | Yes      | Yes      | No       | Yes      | Yes      | Yes      | Yes       | Yes       | Include   |
| Karami (2020)          | Yes      | Yes      | Yes      | Yes      | Yes      | No       | Yes      | Yes      | Yes      | NA        | Yes       | Include   |
| Sieweke (2020)         | NA       | NA       | Yes      | NA       | NA       | No       | Yes      | Yes      | Yes      | NA        | Yes       | Include   |
| Hong (2020)            | NA       | NA       | Yes      | NA       | NA       | No       | Yes      | Yes      | Yes      | NA        | Yes       | Include   |
| Sonu (2020)            | NA       | NA       | Yes      | NA       | NA       | No       | Yes      | Yes      | Yes      | NA        | Yes       | Include   |
| Alushi (2019)          | Yes      | Yes      | Yes      | No       | NA       | No       | Yes      | Yes      | Yes      | NA        | Yes       | Include   |
| Karatolios (2019)      | NA       | NA       | Yes      | NA       | NA       | No       | Yes      | Yes      | Yes      | NA        | Yes       | Include   |
| Schrage (2019)         | Yes      | Yes      | Yes      | Yes      | Yes      | No       | Yes      | Yes      | Yes      | NA        | Yes       | Include   |
| Monteagudo-Vela (2021) | Yes      | Yes      | Yes      | No       | NA       | No       | Yes      | Yes      | Yes      | NA        | Yes       | Include   |
| O'Neill (2019)         | NA       | NA       | Yes      | NA       | NA       | No       | Yes      | Yes      | Yes      | NA        | Yes       | Include   |
| Ouweneel (2019)        | NA       | NA       | Yes      | NA       | NA       | No       | Yes      | Yes      | Yes      | NA        | Yes       | Include   |
| Hritani (2019)         | NA       | NA       | Yes      | NA       | NA       | Unclear  | Yes      | Yes      | Yes      | NA        | Yes       | Include   |
| Abouelwafa (2019)      | NA       | NA       | Yes      | NA       | NA       | Unclear  | Yes      | Yes      | Yes      | NA        | Yes       | Include   |
| Fux (2019)             | NA       | NA       | Yes      | NA       | NA       | No       | Yes      | Yes      | Yes      | NA        | Yes       | Include   |
| Chong (2018)           | NA       | NA       | Yes      | NA       | NA       | No       | Yes      | Yes      | Yes      | NA        | Yes       | Include   |
| Liao (2018)            | NA       | NA       | Yes      | NA       | NA       | No       | Yes      | Yes      | Yes      | NA        | Yes       | Include   |
| Toda (2018)            | NA       | NA       | Yes      | NA       | NA       | Unclear  | Yes      | Yes      | Yes      | NA        | Yes       | Include   |
| Pieri (2018)           | Yes      | Yes      | Yes      | Yes      | No       | No       | Yes      | Yes      | Yes      | NA        | Yes       | Include   |
| Sun (2018)             | NA       | NA       | Yes      | NA       | NA       | No       | Yes      | Yes      | Yes      | NA        | Yes       | Include   |
| Dangers (2017)         | NA       | NA       | Yes      | NA       | NA       | No       | Yes      | Yes      | Yes      | NA        | Yes       | Include   |
| Meraj (2017)           | NA       | NA       | Yes      | NA       | NA       | No       | Yes      | Yes      | Yes      | NA        | Yes       | Include   |

|                  |    |    |     |    |    |         |     |     |     |    |     |         |
|------------------|----|----|-----|----|----|---------|-----|-----|-----|----|-----|---------|
| Alhussein (2017) | NA | NA | Yes | NA | NA | Unclear | Yes | Yes | Yes | NA | No  | Include |
| Vase (2017)      | NA | NA | Yes | NA | NA | No      | Yes | Yes | Yes | NA | Yes | Include |
| Liao (2017)      | NA | NA | Yes | NA | NA | No      | Yes | Yes | Yes | NA | Yes | Include |
| Toda (2022)      | NA | NA | Yes | NA | NA | No      | Yes | Yes | Yes | NA | Yes | Include |

Item 1: Were the two groups similar and recruited from the same population?

Item 2: Were the exposures measured similarly to assign people to both exposed and unexposed groups?

Item 3: Was the exposure measured in a valid and reliable way?

Item 4: Were confounding factors identified?

Item 5: Were strategies to deal with confounding factors stated?

Item 6: Were the groups/participants free of the outcome at the start of the study (or at the moment of exposure)?

Item 7: Were the outcomes measured in a valid and reliable way?

Item 8: Was the follow up time reported and sufficient to be long enough for outcomes to occur?

Item 9: Was follow up complete, and if not, were the reasons to loss to follow up described and explored?

Item 10: Were strategies to address incomplete follow up utilized?

Item 11: Was appropriate statistical analysis used?

Item 12: Overall Appraisal

**Table S7. Risk of bias assessment. Checklist for RCTs**

| Study             | 1   | 2       | 3   | 4   | 5  | 6   | 7   | 8   | 9   | 10  | 11  | 12  | 13  | 14      |
|-------------------|-----|---------|-----|-----|----|-----|-----|-----|-----|-----|-----|-----|-----|---------|
| Karami (2021)     | Yes | Yes     | Yes | Yes | No | Yes | Include |
| Brunner (2019)    | Yes | Unclear | Yes | Yes | No | Yes | Include |
| Ouweneel (2017)   | Yes | Yes     | Yes | Yes | No | Yes | Include |
| Lackermair (2021) | Yes | Yes     | Yes | Yes | No | Yes | Include |

Item 1: Was true randomization used for assignment of participants to treatment groups?

Item 2: Was allocation to treatment groups concealed?

Item 3: Were treatment groups similar at the baseline?

Item 4: Were participants blind to treatment assignment?

Item 5: Were those delivering treatment blind to treatment assignment?

- Item 6: Were outcomes assessors blind to treatment assignment?
- Item 7: Were treatment groups treated identically other than the intervention of interest?
- Item 8: Was follow up complete and if not, were differences between groups in terms of their follow up adequately described and analyzed?
- Item 9: Were participants analyzed in the groups to which they were randomized?
- Item 10: Were outcomes measured in the same way for treatment groups?
- Item 11: Were outcomes measured in a reliable way?
- Item 12: Was appropriate statistical analysis used?
- Item 13: Was the trial design appropriate, and any deviations from the standard RCT design (individual randomization, parallel groups) accounted for in the conduct and analysis of the trial?
- Item 14: Overall Appraisal

**Figure S1. Mortality in hospital, at discharge, on device, to next therapy, to explant: Impella and VA-ECMO**

## Mortality (% of patients) - Impella

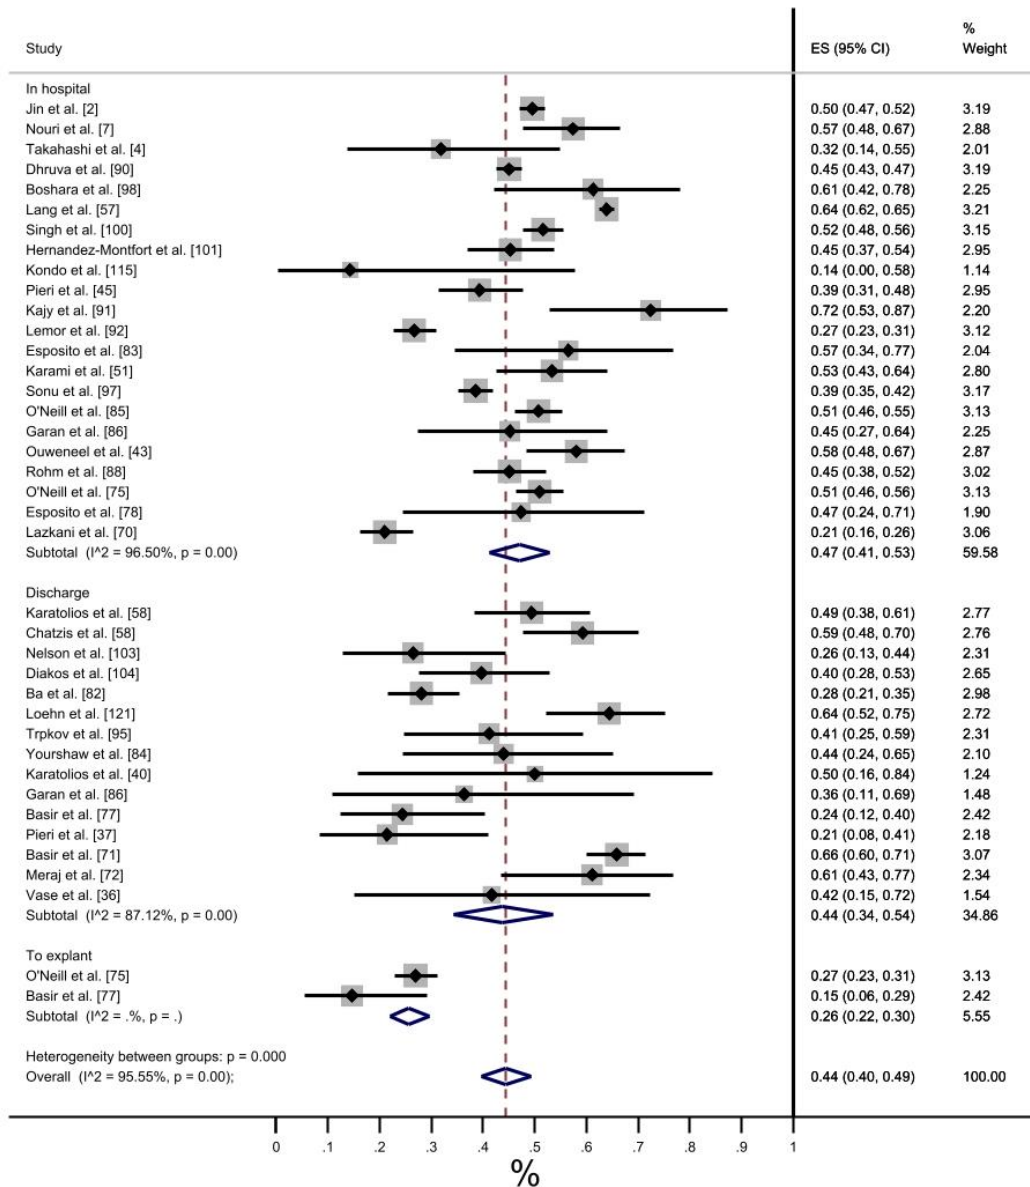

## Mortality (% of patients) - ECMO

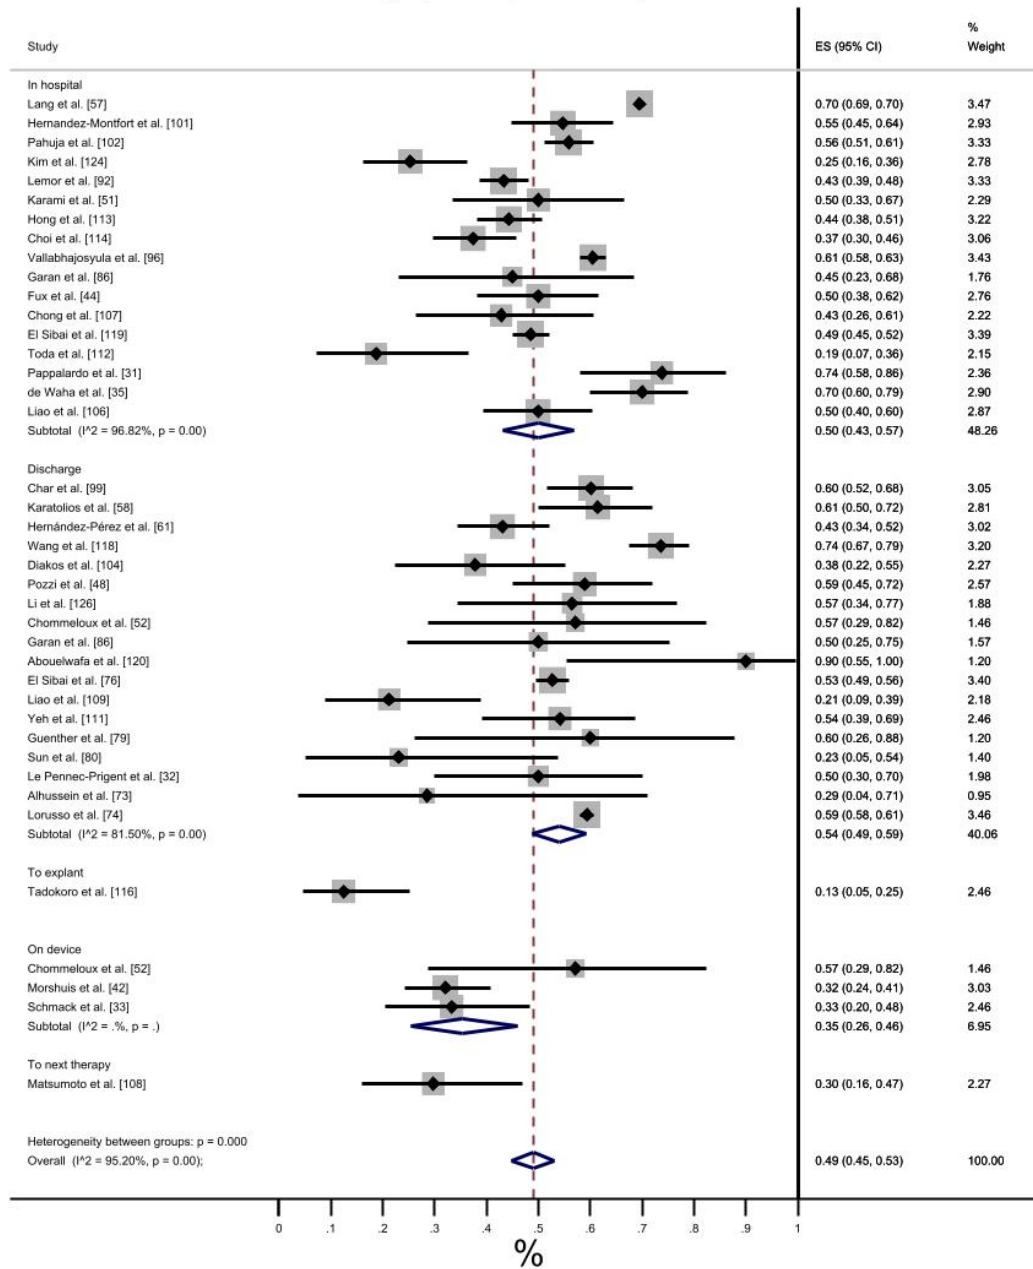

**Figure S2. Bridge to LVAD: Impella and VA-ECMO**

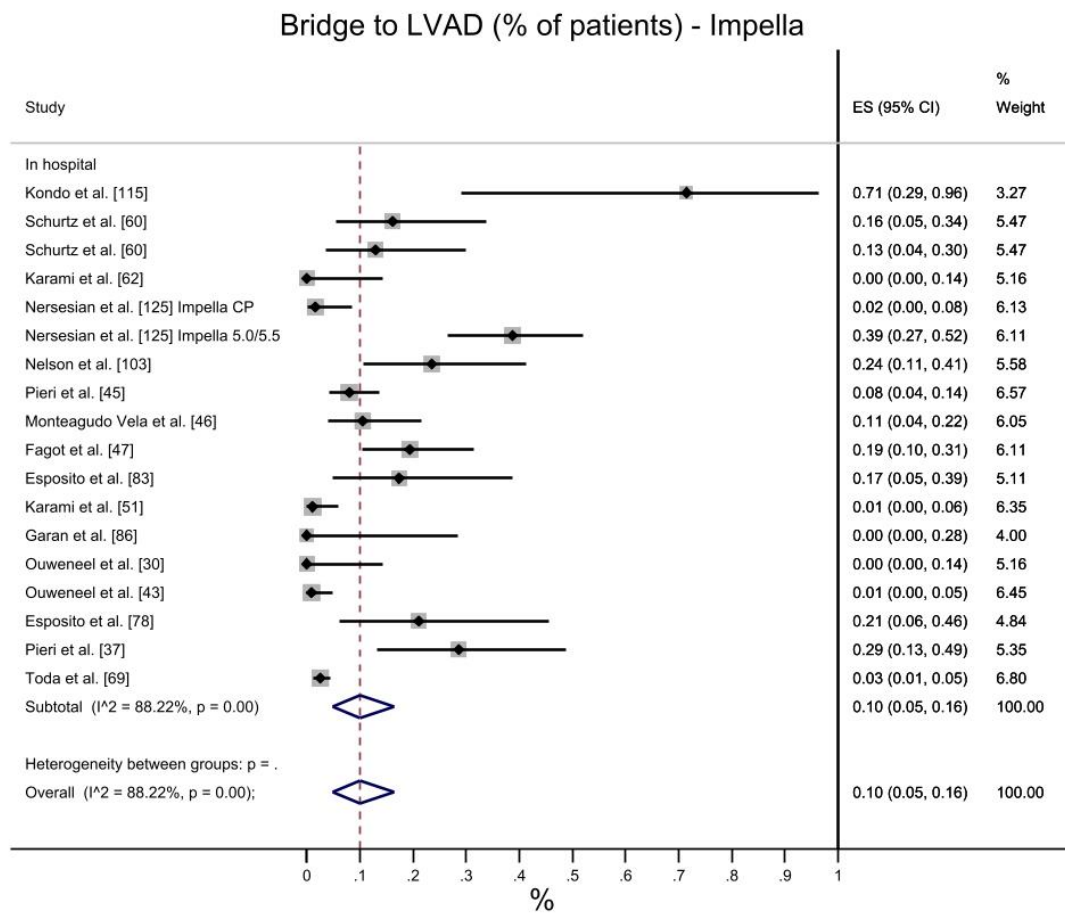

## Bridge to LVAD (% of patients) - ECMO

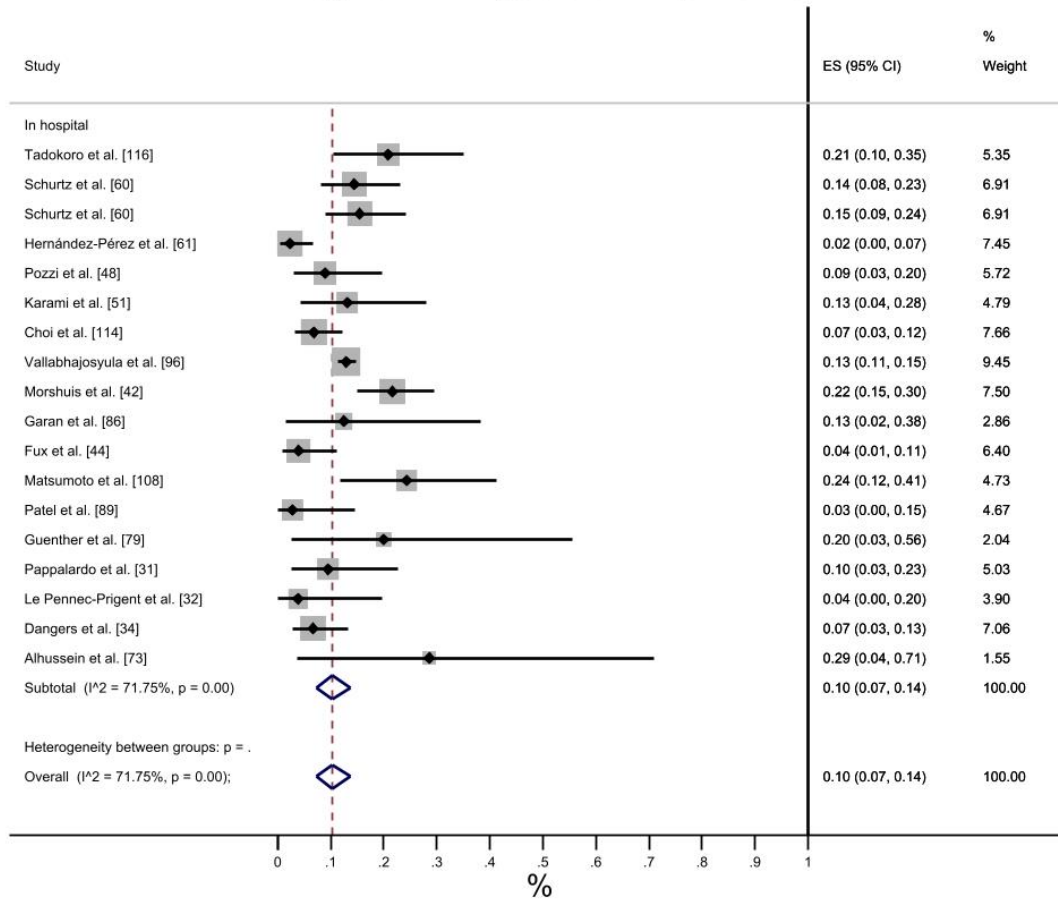



**Figure S3. Bridge to transplant: Impella and VA-ECMO**

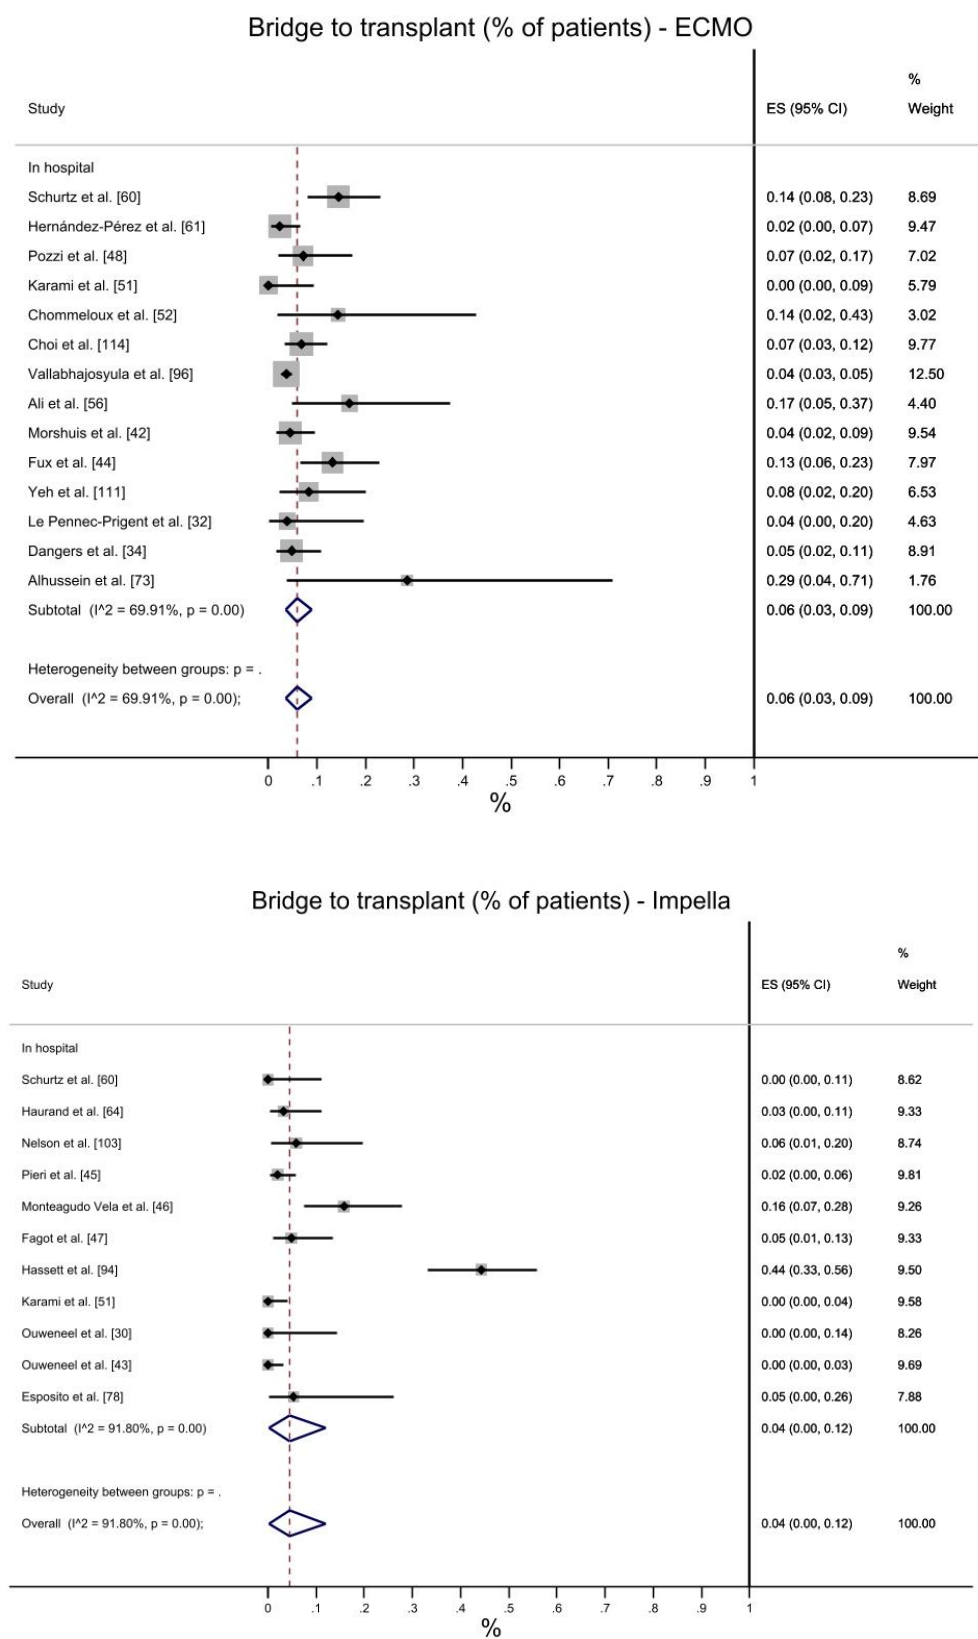

**Figure S4. Renal failure: Impella and VA-ECMO**

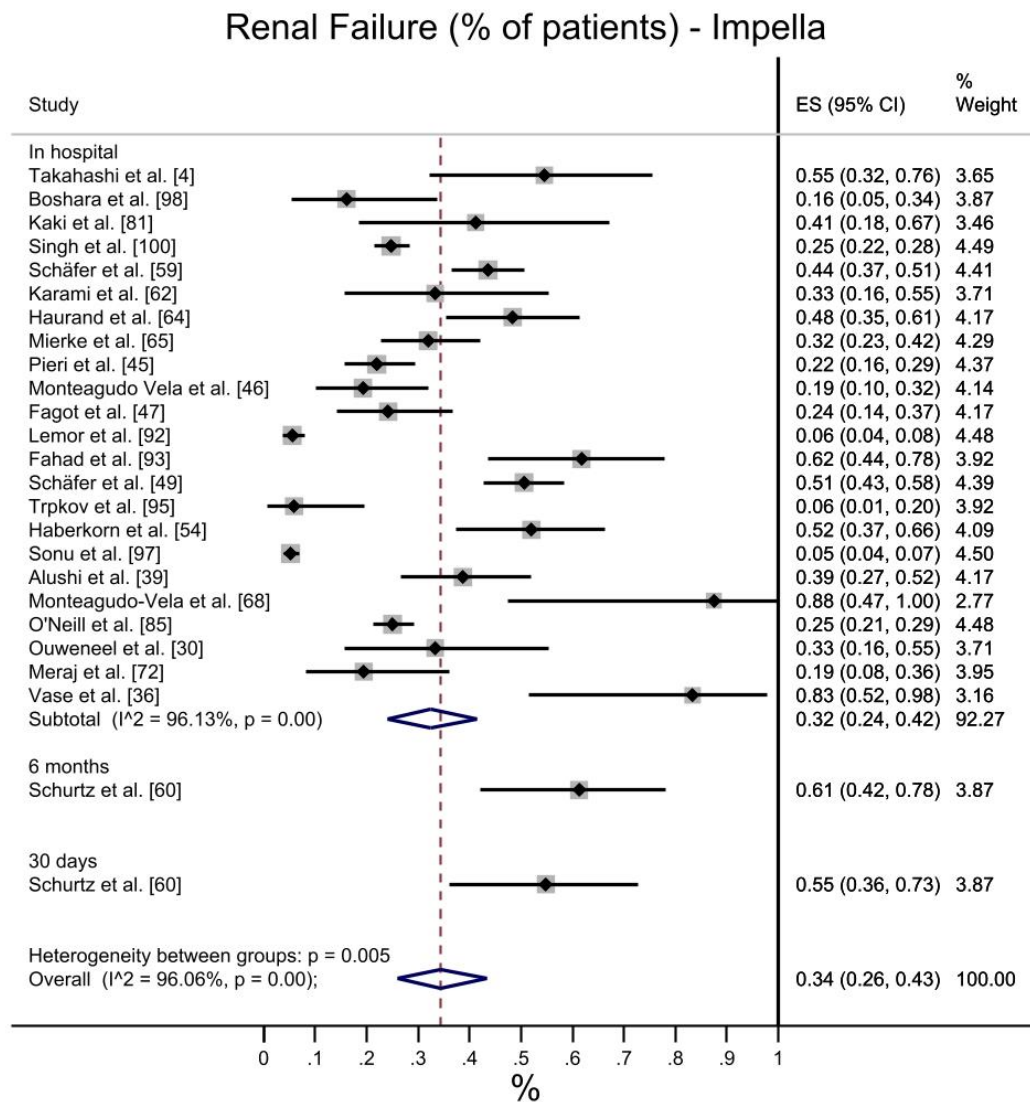

## Renal Failure (% of patients) - ECMO

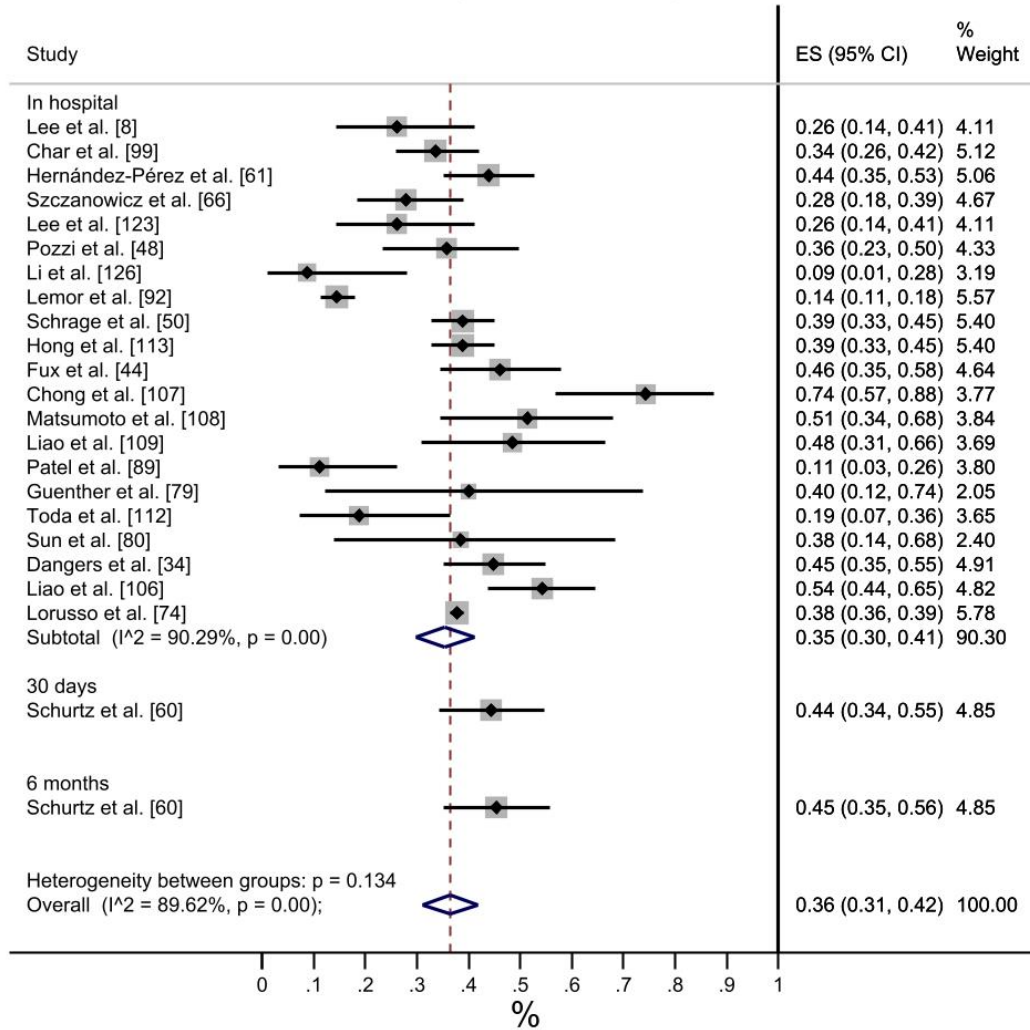

**Figure S5. Days on support: Impella and VA-ECMO**

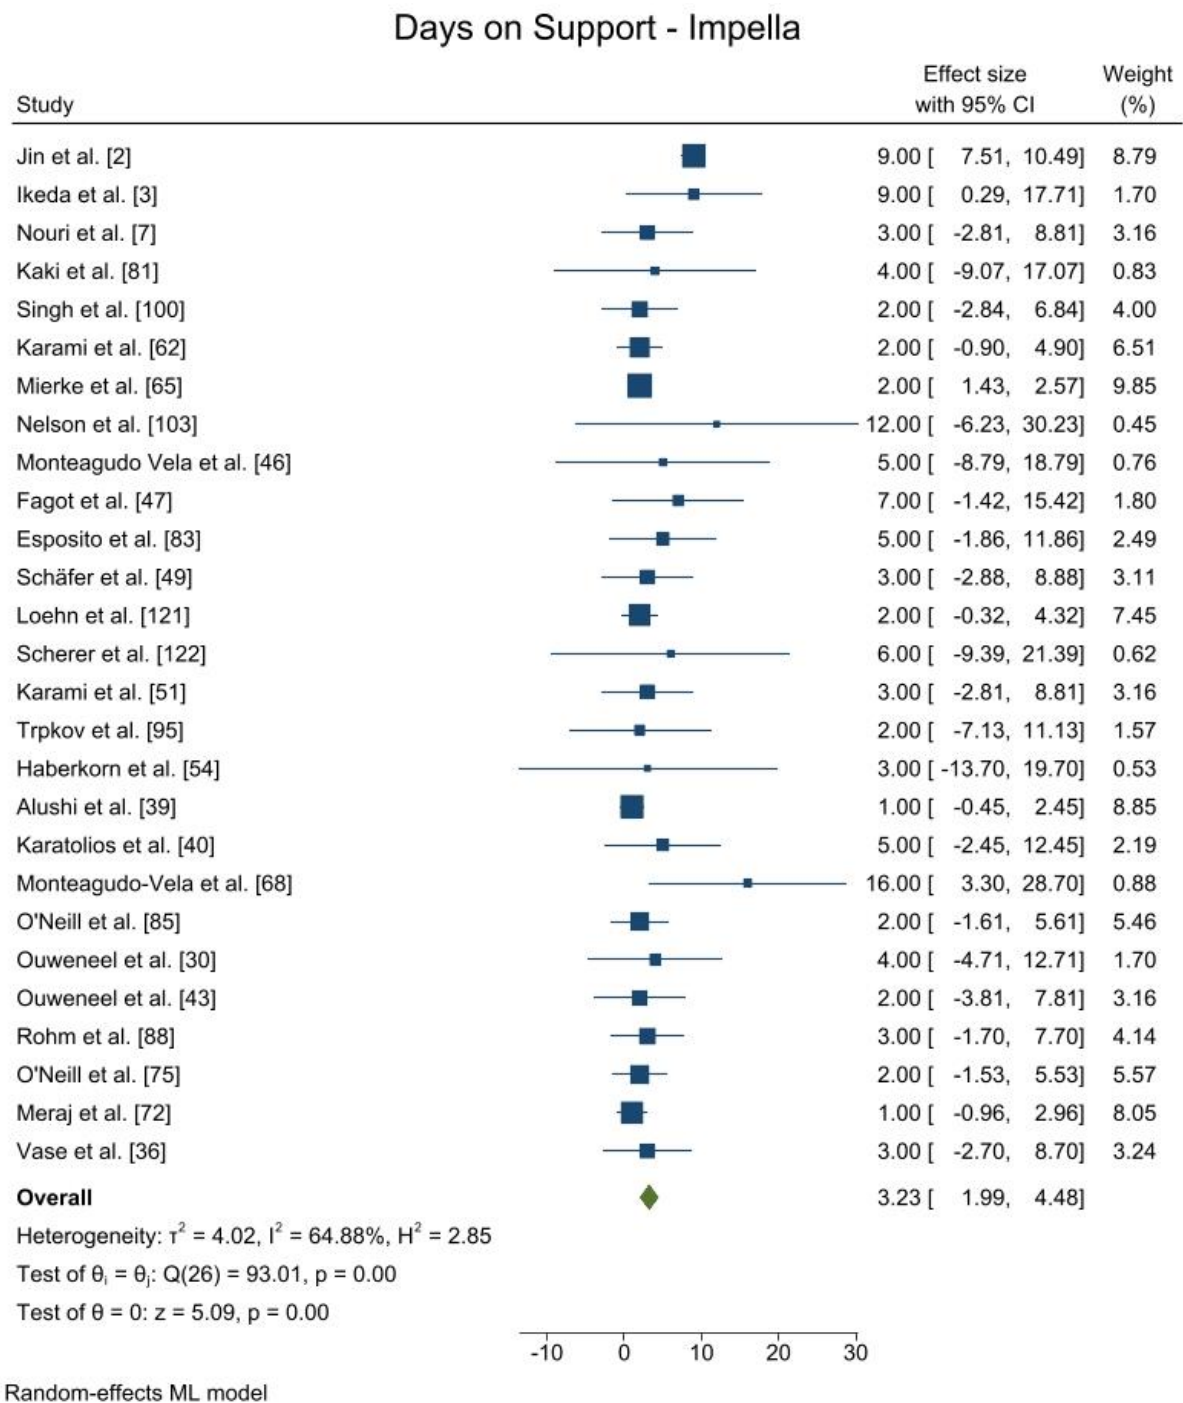

## Days on Support - ECMO

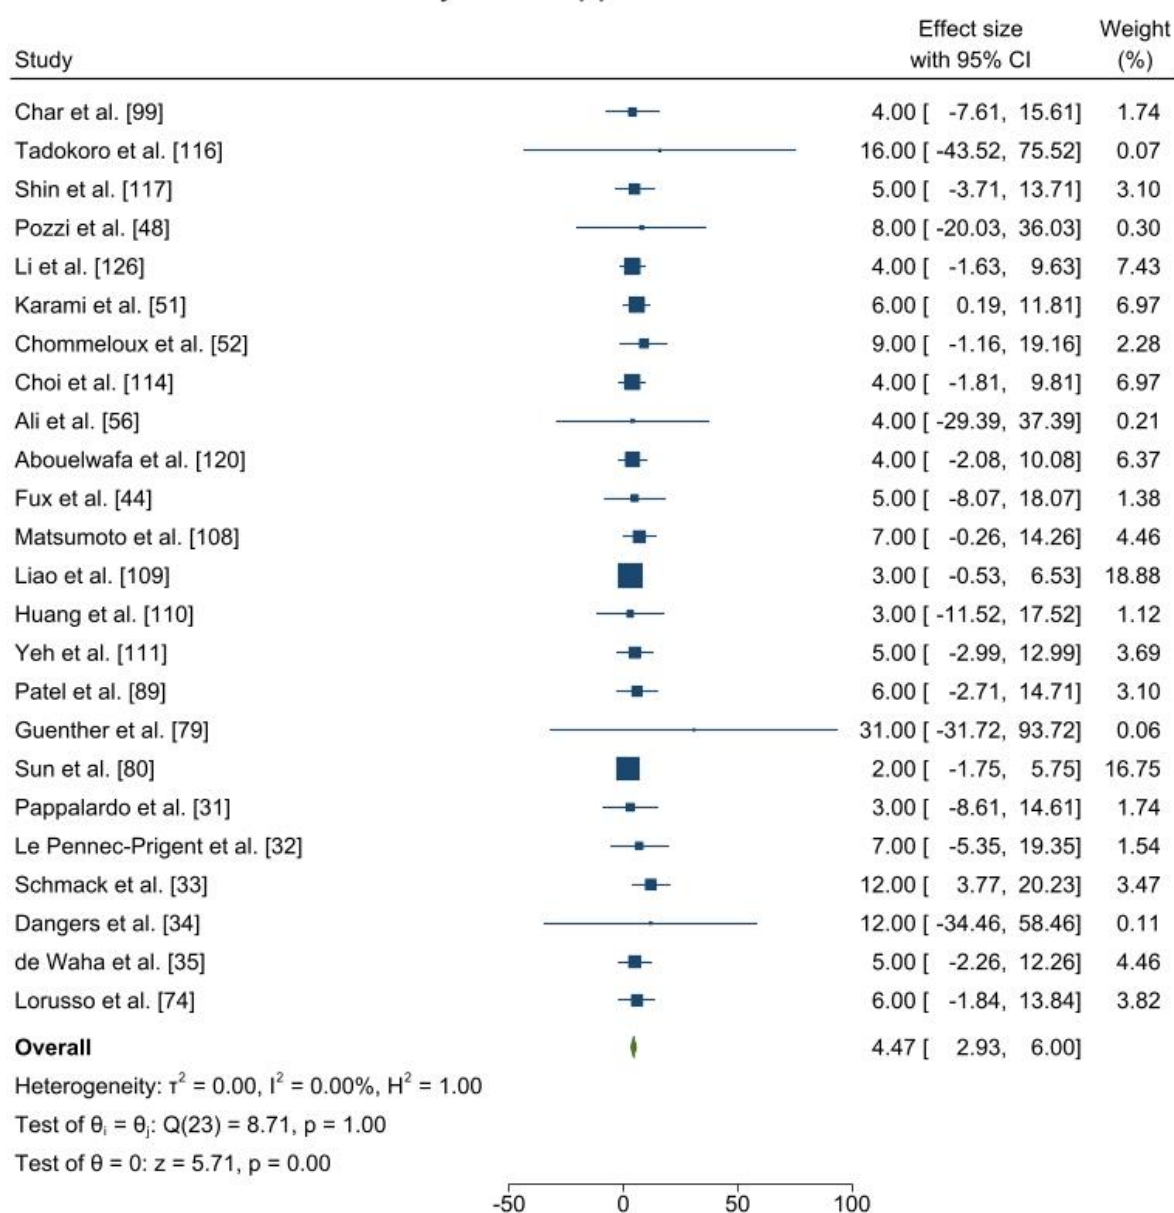

Random-effects ML model

### Supplementary Figure S6. Pre-PCI vs. Post-PCI mortality at 30 days

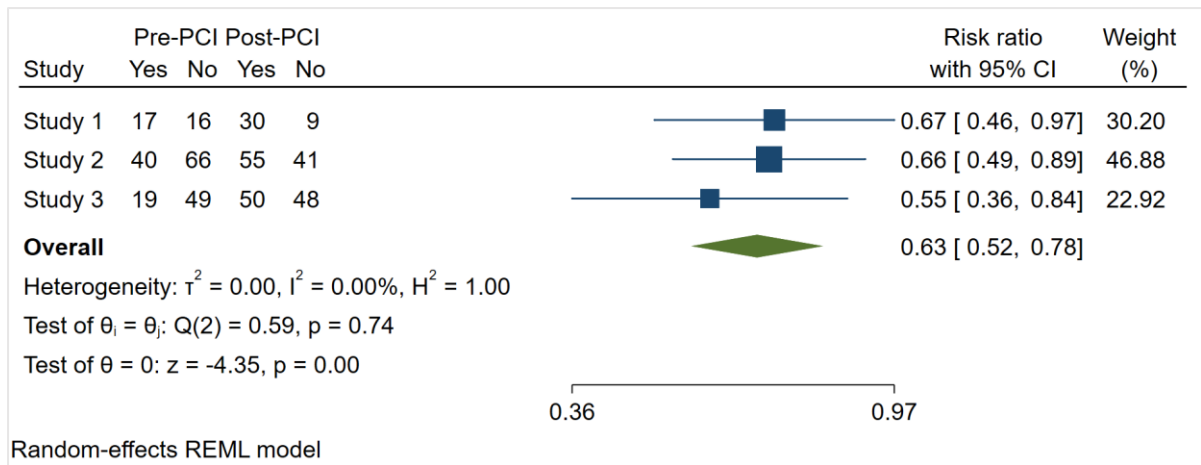

Study 1 = Lohen et al. [121]; Study 2 = Schäfer et al. [49]; Study 3 = Schäfer et al. [122]

Yes = Mortality; No = Survival

### Supplementary Figure S7. Pre-PCI vs. Post-PCI Mortality at discharge

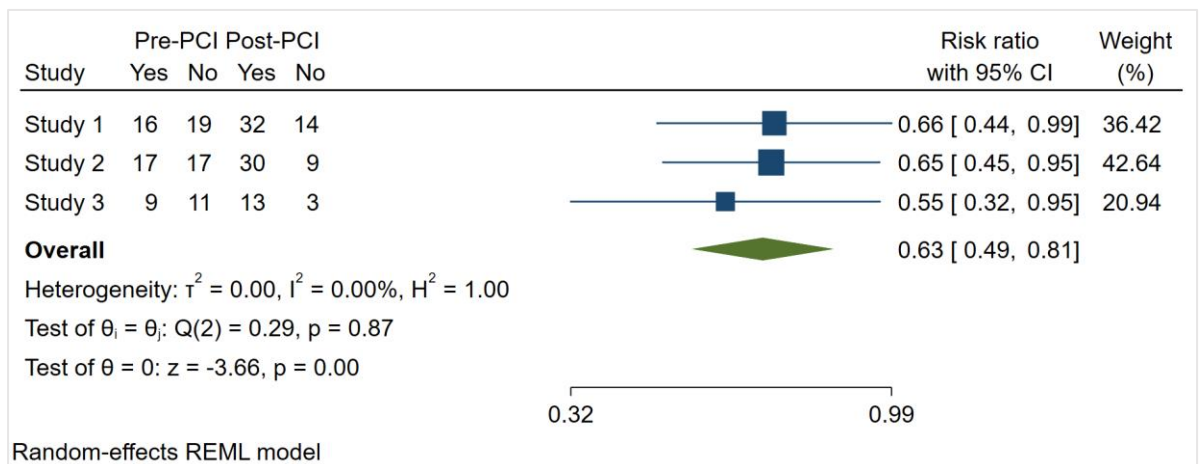

Study 1 = Chatzis et al. [58]; Study 2 = Lohen et al. [121]; Study 3 = Meraj et al. [72]

Yes = Mortality; No = Survival
